# Supplementary material for: Real-World Survival Outcomes Based on EGFR Mutation Status in Chinese Patients With Lung Adenocarcinoma After Complete Resection: Results From the ICAN Study
Source: PubMed Central journal article supplement — JTO Clin Res Rep. 2021 Nov 25;3(1):100257. doi: 10.1016/j.jtocrr.2021.100257 (PMC8683612; doi:10.1016/j.jtocrr.2021.100257), 2021-11-25
Supplement: mmc1.pdf [file mmc1.pdf]

**A**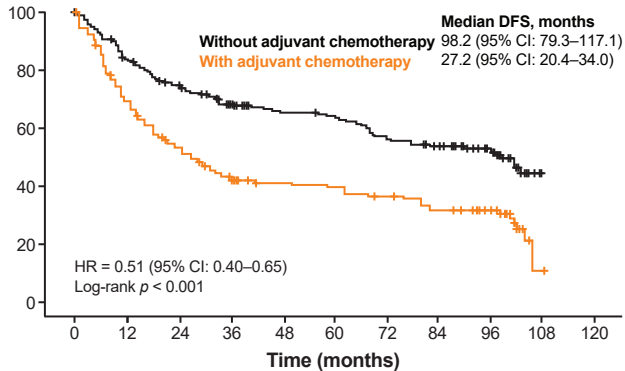

| No. at risk                   | 0   | 12  | 24  | 36  | 48  | 60  | 72 | 84 | 96 | 108 | 120 |
|-------------------------------|-----|-----|-----|-----|-----|-----|----|----|----|-----|-----|
| Without adjuvant chemotherapy | 265 | 217 | 189 | 156 | 106 | 103 | 92 | 84 | 64 | 1   | 0   |
| With adjuvant chemotherapy    | 207 | 140 | 104 | 78  | 53  | 51  | 46 | 39 | 30 | 1   | 0   |

**B**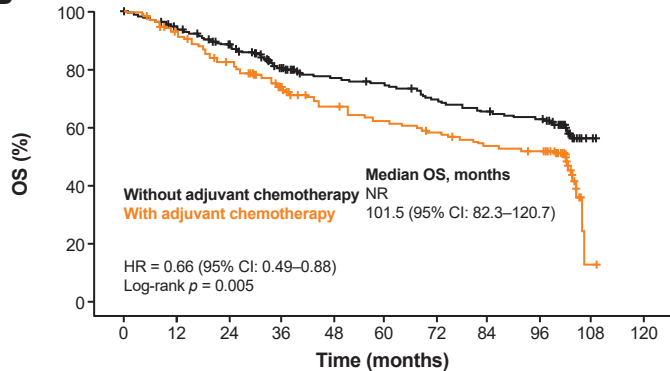

| No. at risk                   | 0   | 12  | 24  | 36  | 48  | 60  | 72  | 84  | 96  | 108 | 120 |
|-------------------------------|-----|-----|-----|-----|-----|-----|-----|-----|-----|-----|-----|
| Without adjuvant chemotherapy | 265 | 247 | 223 | 182 | 126 | 122 | 112 | 105 | 100 | 2   | 0   |
| With adjuvant chemotherapy    | 207 | 189 | 161 | 132 | 88  | 80  | 74  | 66  | 63  | 1   | 0   |
