# Supplementary material for: Real-World Survival Outcomes Based on EGFR Mutation Status in Chinese Patients With Lung Adenocarcinoma After Complete Resection: Results From the ICAN Study
Source: PubMed Central journal article supplement — JTO Clin Res Rep. 2021 Nov 25;3(1):100257. doi: 10.1016/j.jtocrr.2021.100257 (PMC8683612; doi:10.1016/j.jtocrr.2021.100257), 2021-11-25
Supplement: mmc2.pdf [file mmc2.pdf]

**A**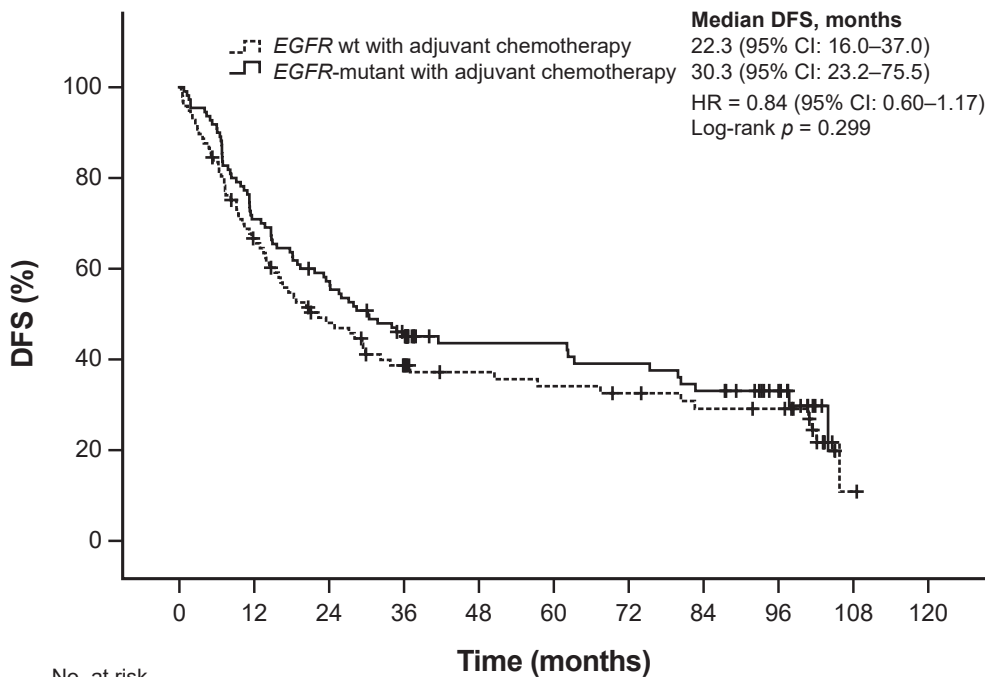

| No. at risk                                   | 0   | 12 | 24 | 36 | 48 | 60 | 72 | 84 | 96 | 108 | 120 |
|-----------------------------------------------|-----|----|----|----|----|----|----|----|----|-----|-----|
| <i>EGFR wt with adjuvant chemotherapy</i>     | 97  | 62 | 42 | 31 | 24 | 22 | 20 | 17 | 16 | 1   | 0   |
| <i>EGFR-mutant with adjuvant chemotherapy</i> | 110 | 78 | 62 | 47 | 29 | 29 | 26 | 22 | 14 | 0   | 0   |

**B**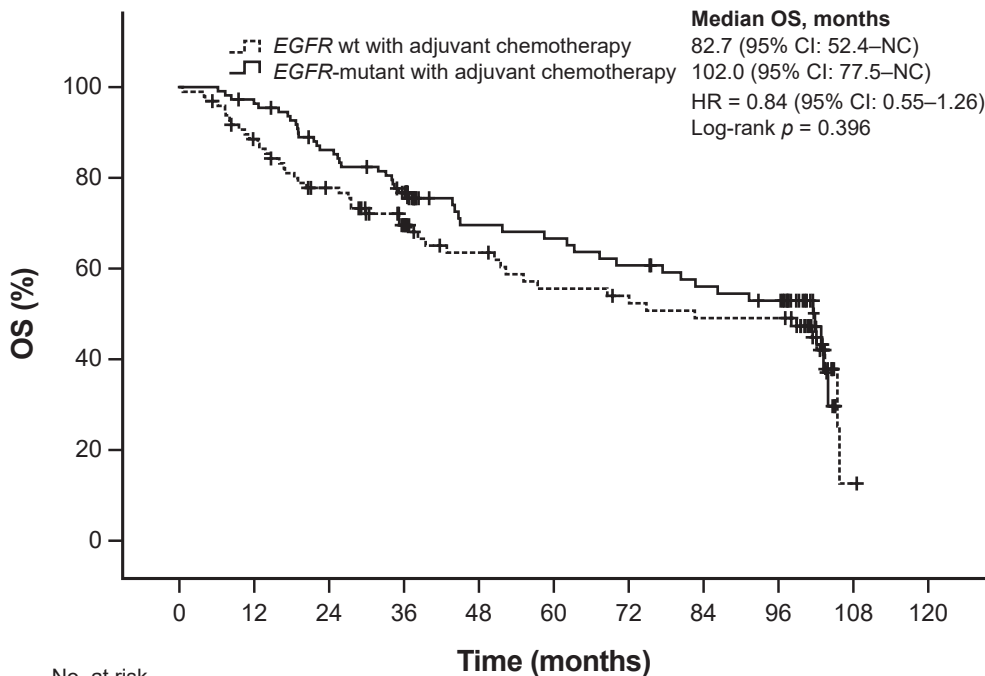

| No. at risk                                   | 0   | 12  | 24 | 36 | 48 | 60 | 72 | 84 | 96 | 108 | 120 |
|-----------------------------------------------|-----|-----|----|----|----|----|----|----|----|-----|-----|
| <i>EGFR wt with adjuvant chemotherapy</i>     | 97  | 83  | 69 | 53 | 41 | 35 | 33 | 30 | 30 | 1   | 0   |
| <i>EGFR-mutant with adjuvant chemotherapy</i> | 110 | 106 | 92 | 79 | 47 | 45 | 41 | 36 | 33 | 0   | 0   |
