# Supplementary material for: Real-World Survival Outcomes Based on EGFR Mutation Status in Chinese Patients With Lung Adenocarcinoma After Complete Resection: Results From the ICAN Study
Source: PubMed Central journal article supplement — JTO Clin Res Rep. 2021 Nov 25;3(1):100257. doi: 10.1016/j.jtocrr.2021.100257 (PMC8683612; doi:10.1016/j.jtocrr.2021.100257), 2021-11-25
Supplement: mmc3.pdf [file mmc3.pdf]

**A**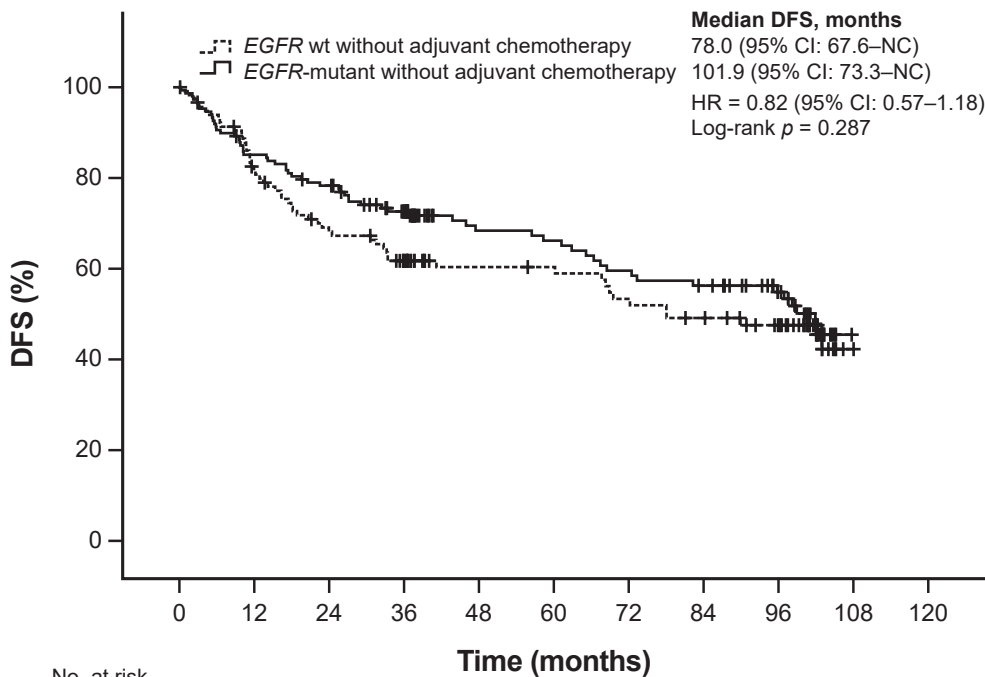

| No. at risk                               |     | 0   | 12  | 24 | 36 | 48 | 60 | 72 | 84 | 96 | 108 | 120 |
|-------------------------------------------|-----|-----|-----|----|----|----|----|----|----|----|-----|-----|
| EGFR wt without adjuvant chemotherapy     | 115 | 92  | 75  | 62 | 44 | 43 | 38 | 34 | 26 | 1  | 0   |     |
| EGFR-mutant without adjuvant chemotherapy | 150 | 125 | 114 | 94 | 62 | 60 | 54 | 50 | 38 | 0  | 0   |     |

**B**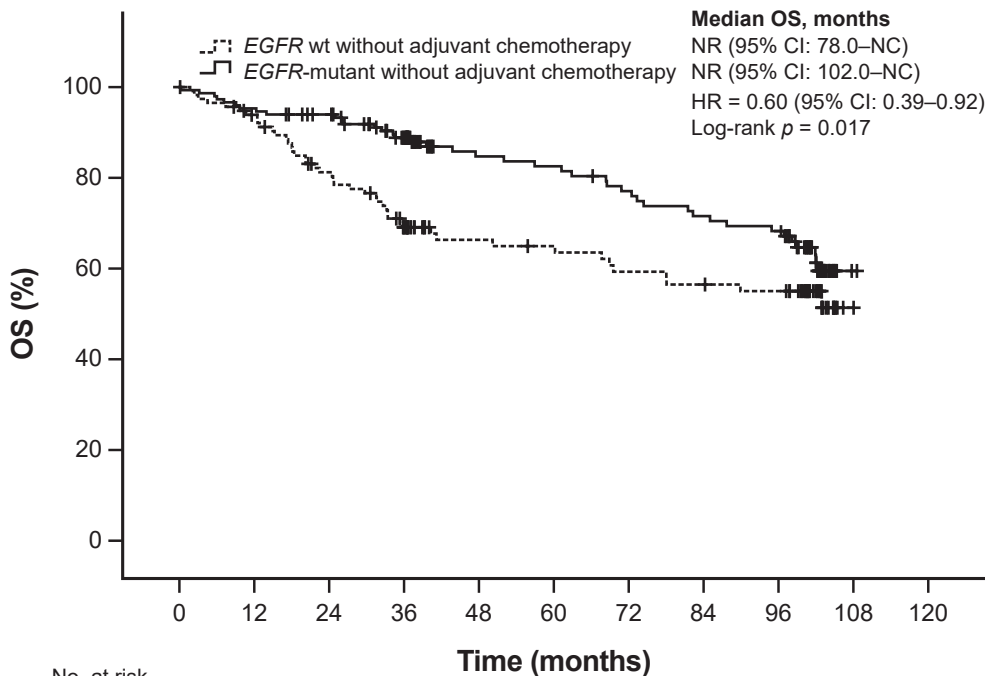

| No. at risk                               |     | 0   | 12  | 24  | 36 | 48 | 60 | 72 | 84 | 96 | 108 | 120 |
|-------------------------------------------|-----|-----|-----|-----|----|----|----|----|----|----|-----|-----|
| EGFR wt without adjuvant chemotherapy     | 115 | 105 | 88  | 69  | 48 | 46 | 42 | 40 | 38 | 1  | 0   |     |
| EGFR-mutant without adjuvant chemotherapy | 150 | 142 | 135 | 113 | 78 | 76 | 70 | 65 | 62 | 1  | 0   |     |
